# Supplementary material for: Low-field strain-driven phase diagram of (Bi1/2Na1/2)TiO3–SrTiO3–LiNbO3 lead-free relaxor ceramics for actuator applications
Source: Royal Society of Chemistry journal article supplement (doi:10.1039/d6ra00669h), 2026-05-18
Supplement: d6ra00669h1.xlsx [file d6ra00669h1.xlsx]

## Sheet: Sheet1
2-Theta	Intensity
3	3096.67
3.02	3063.33
3.04	3070
3.06	3076.67
3.08	3063.33
3.1	3056.67
3.12	3076.67
3.14	3096.67
3.16	3096.67
3.18	3063.33
3.2	3070
3.22	3086.67
3.24	3086.67
3.26	3076.67
3.28	3073.33
3.3	3100
3.32	3063.33
3.34	3056.67
3.36	3060
3.38	3080
3.4	3070
3.42	3083.33
3.44	3070
3.46	3080
3.48	3096.67
3.5	3066.67
3.52	3060
3.54	3073.33
3.56	3083.33
3.58	3076.67
3.6	3066.67
3.62	3076.67
3.64	3070
3.66	3060
3.68	3046.67
3.7	3090
3.72	3060
3.74	3063.33
3.76	3066.67
3.78	3060
3.8	3046.67
3.82	3060
3.84	3076.67
3.86	3096.67
3.88	3076.67
3.9	3080
3.92	3050
3.94	3060
3.96	3073.33
3.98	3060
4	3036.67
4.02	3070
4.04	3076.67
4.06	3050
4.08	3046.67
4.1	3040
4.12	3050
4.14	3053.33
4.16	3063.33
4.18	3063.33
4.2	3050
4.22	3056.67
4.24	3053.33
4.26	3050
4.28	3060
4.3	3030
4.32	3060
4.34	3060
4.36	3076.67
4.38	3060
4.4	3063.33
4.42	3063.33
4.44	3043.33
4.46	3046.67
4.48	3066.67
4.5	3050
4.52	3053.33
4.54	3036.67
4.56	3043.33
4.58	3030
4.6	3033.33
4.62	3053.33
4.64	3053.33
4.66	3050
4.68	3040
4.7	3053.33
4.72	3063.33
4.74	3086.67
4.76	3093.33
4.78	3046.67
4.8	3070
4.82	3050
4.84	3036.67
4.86	3033.33
4.88	3026.67
4.9	3040
4.92	3053.33
4.94	3053.33
4.96	3053.33
4.98	3050
5	3056.67
5.02	3050
5.04	3043.33
5.06	3076.67
5.08	3050
5.1	3053.33
5.12	3050
5.14	3043.33
5.16	3036.67
5.18	3056.67
5.2	3053.33
5.22	3060
5.24	3033.33
5.26	3053.33
5.28	3036.67
5.3	3066.67
5.32	3056.67
5.34	3060
5.36	3046.67
5.38	3040
5.4	3040
5.42	3076.67
5.44	3016.67
5.46	3060
5.48	3066.67
5.5	3046.67
5.52	3043.33
5.54	3043.33
5.56	3046.67
5.58	3043.33
5.6	3050
5.62	3053.33
5.64	3043.33
5.66	3046.67
5.68	3046.67
5.7	3043.33
5.72	3040
5.74	3066.67
5.76	3040
5.78	3026.67
5.8	3070
5.82	3040
5.84	3063.33
5.86	3030
5.88	3046.67
5.9	3053.33
5.92	3043.33
5.94	3060
5.96	3050
5.98	3043.33
6	3040
6.02	3066.67
6.04	3040
6.06	3070
6.08	3043.33
6.1	3036.67
6.12	3030
6.14	3023.33
6.16	3026.67
6.18	3040
6.2	3043.33
6.22	3033.33
6.24	3056.67
6.26	3046.67
6.28	3050
6.3	3053.33
6.32	3046.67
6.34	3050
6.36	3020
6.38	3030
6.4	3050
6.42	3053.33
6.44	3023.33
6.46	3056.67
6.48	3040
6.5	3060
6.52	3060
6.54	3043.33
6.56	3046.67
6.58	3043.33
6.6	3066.67
6.62	3033.33
6.64	3040
6.66	3036.67
6.68	3043.33
6.7	3056.67
6.72	3020
6.74	3046.67
6.76	3073.33
6.78	3060
6.8	3026.67
6.82	3043.33
6.84	3050
6.86	3050
6.88	3026.67
6.9	3053.33
6.92	3040
6.94	3053.33
6.96	3040
6.98	3063.33
7	3040
7.02	3040
7.04	3056.67
7.06	3033.33
7.08	3023.33
7.1	3033.33
7.12	3040
7.14	3046.67
7.16	3066.67
7.18	3033.33
7.2	3040
7.22	3036.67
7.24	3063.33
7.26	3026.67
7.28	3030
7.3	3046.67
7.32	3030
7.34	3033.33
7.36	3033.33
7.38	3033.33
7.4	3043.33
7.42	3043.33
7.44	3046.67
7.46	3043.33
7.48	3036.67
7.5	3053.33
7.52	3036.67
7.54	3053.33
7.56	3036.67
7.58	3046.67
7.6	3040
7.62	3043.33
7.64	3026.67
7.66	3026.67
7.68	3030
7.7	3076.67
7.72	3043.33
7.74	3043.33
7.76	3043.33
7.78	3040
7.8	3036.67
7.82	3023.33
7.84	3060
7.86	3043.33
7.88	3056.67
7.9	3030
7.92	3050
7.94	3036.67
7.96	3036.67
7.98	3036.67
8	3040
8.02	3043.33
8.04	3023.33
8.06	3043.33
8.08	3020
8.1	3040
8.12	3023.33
8.14	3040
8.16	3033.33
8.18	3033.33
8.2	3043.33
8.22	3050
8.24	3023.33
8.26	3043.33
8.28	3040
8.3	3040
8.32	3050
8.34	3033.33
8.36	3063.33
8.38	3033.33
8.4	3043.33
8.42	3056.67
8.44	3060
8.46	3036.67
8.48	3043.33
8.5	3036.67
8.52	3043.33
8.54	3043.33
8.56	3050
8.58	3040
8.6	3040
8.62	3040
8.64	3046.67
8.66	3016.67
8.68	3036.67
8.7	3046.67
8.72	3046.67
8.74	3026.67
8.76	3070
8.78	3040
8.8	3036.67
8.82	3026.67
8.84	3063.33
8.86	3040
8.88	3040
8.9	3070
8.92	3023.33
8.94	3043.33
8.96	3036.67
8.98	3043.33
9	3046.67
9.02	3026.67
9.04	3053.33
9.06	3033.33
9.08	3036.67
9.1	3036.67
9.12	3036.67
9.14	3036.67
9.16	3033.33
9.18	3046.67
9.2	3043.33
9.22	3043.33
9.24	3040
9.26	3030
9.28	3063.33
9.3	3053.33
9.32	3036.67
9.34	3063.33
9.36	3033.33
9.38	3026.67
9.4	3050
9.42	3073.33
9.44	3053.33
9.46	3040
9.48	3030
9.5	3036.67
9.52	3053.33
9.54	3043.33
9.56	3040
9.58	3056.67
9.6	3043.33
9.62	3026.67
9.64	3050
9.66	3036.67
9.68	3023.33
9.7	3040
9.72	3036.67
9.74	3033.33
9.76	3036.67
9.78	3023.33
9.8	3043.33
9.82	3043.33
9.84	3040
9.86	3033.33
9.88	3026.67
9.9	3033.33
9.92	3036.67
9.94	3053.33
9.96	3053.33
9.98	3056.67
10	3036.67
10.02	3040
10.04	3043.33
10.06	3056.67
10.08	3030
10.1	3036.67
10.12	3053.33
10.14	3046.67
10.16	3030
10.18	3046.67
10.2	3056.67
10.22	3046.67
10.24	3043.33
10.26	3050
10.28	3050
10.3	3040
10.32	3040
10.34	3053.33
10.36	3056.67
10.38	3043.33
10.4	3040
10.42	3023.33
10.44	3033.33
10.46	3053.33
10.48	3043.33
10.5	3046.67
10.52	3036.67
10.54	3050
10.56	3010
10.58	3060
10.6	3033.33
10.62	3070
10.64	3040
10.66	3056.67
10.68	3040
10.7	3053.33
10.72	3056.67
10.74	3070
10.76	3050
10.78	3053.33
10.8	3036.67
10.82	3056.67
10.84	3053.33
10.86	3066.67
10.88	3036.67
10.9	3056.67
10.92	3060
10.94	3033.33
10.96	3066.67
10.98	3033.33
11	3033.33
11.02	3040
11.04	3033.33
11.06	3023.33
11.08	3040
11.1	3026.67
11.12	3040
11.14	3040
11.16	3050
11.18	3046.67
11.2	3056.67
11.22	3026.67
11.24	3023.33
11.26	3080
11.28	3050
11.3	3036.67
11.32	3043.33
11.34	3046.67
11.36	3046.67
11.38	3023.33
11.4	3036.67
11.42	3050
11.44	3053.33
11.46	3026.67
11.48	3026.67
11.5	3046.67
11.52	3060
11.54	3043.33
11.56	3043.33
11.58	3033.33
11.6	3026.67
11.62	3040
11.64	3053.33
11.66	3046.67
11.68	3036.67
11.7	3036.67
11.72	3030
11.74	3036.67
11.76	3040
11.78	3040
11.8	3033.33
11.82	3070
11.84	3046.67
11.86	3046.67
11.88	3050
11.9	3060
11.92	3036.67
11.94	3036.67
11.96	3046.67
11.98	3056.67
12	3050
12.02	3060
12.04	3026.67
12.06	3050
12.08	3056.67
12.1	3056.67
12.12	3050
12.14	3053.33
12.16	3033.33
12.18	3046.67
12.2	3036.67
12.22	3026.67
12.24	3030
12.26	3036.67
12.28	3020
12.3	3043.33
12.32	3020
12.34	3043.33
12.36	3063.33
12.38	3043.33
12.4	3036.67
12.42	3070
12.44	3040
12.46	3053.33
12.48	3036.67
12.5	3036.67
12.52	3053.33
12.54	3060
12.56	3040
12.58	3040
12.6	3040
12.62	3050
12.64	3050
12.66	3043.33
12.68	3053.33
12.7	3033.33
12.72	3076.67
12.74	3036.67
12.76	3086.67
12.78	3030
12.8	3033.33
12.82	3060
12.84	3046.67
12.86	3036.67
12.88	3033.33
12.9	3046.67
12.92	3043.33
12.94	3020
12.96	3046.67
12.98	3046.67
13	3036.67
13.02	3043.33
13.04	3070
13.06	3026.67
13.08	3040
13.1	3043.33
13.12	3043.33
13.14	3060
13.16	3043.33
13.18	3020
13.2	3046.67
13.22	3043.33
13.24	3030
13.26	3050
13.28	3036.67
13.3	3020
13.32	3043.33
13.34	3020
13.36	3070
13.38	3043.33
13.4	3040
13.42	3033.33
13.44	3030
13.46	3053.33
13.48	3036.67
13.5	3066.67
13.52	3050
13.54	3050
13.56	3056.67
13.58	3046.67
13.6	3030
13.62	3046.67
13.64	3043.33
13.66	3026.67
13.68	3063.33
13.7	3056.67
13.72	3030
13.74	3033.33
13.76	3026.67
13.78	3033.33
13.8	3036.67
13.82	3033.33
13.84	3046.67
13.86	3050
13.88	3053.33
13.9	3056.67
13.92	3043.33
13.94	3043.33
13.96	3070
13.98	3060
14	3060
14.02	3036.67
14.04	3046.67
14.06	3050
14.08	3053.33
14.1	3036.67
14.12	3023.33
14.14	3046.67
14.16	3056.67
14.18	3016.67
14.2	3036.67
14.22	3073.33
14.24	3033.33
14.26	3036.67
14.28	3046.67
14.3	3056.67
14.32	3040
14.34	3043.33
14.36	3046.67
14.38	3063.33
14.4	3066.67
14.42	3053.33
14.44	3046.67
14.46	3050
14.48	3053.33
14.5	3036.67
14.52	3040
14.54	3040
14.56	3050
14.58	3040
14.6	3036.67
14.62	3043.33
14.64	3046.67
14.66	3040
14.68	3056.67
14.7	3026.67
14.72	3023.33
14.74	3033.33
14.76	3033.33
14.78	3060
14.8	3030
14.82	3066.67
14.84	3056.67
14.86	3046.67
14.88	3040
14.9	3026.67
14.92	3036.67
14.94	3050
14.96	3043.33
14.98	3050
15	3046.67
15.02	3056.67
15.04	3036.67
15.06	3050
15.08	3066.67
15.1	3040
15.12	3036.67
15.14	3046.67
15.16	3043.33
15.18	3053.33
15.2	3046.67
15.22	3040
15.24	3050
15.26	3046.67
15.28	3056.67
15.3	3060
15.32	3070
15.34	3026.67
15.36	3056.67
15.38	3050
15.4	3040
15.42	3040
15.44	3040
15.46	3026.67
15.48	3050
15.5	3050
15.52	3070
15.54	3030
15.56	3030
15.58	3046.67
15.6	3040
15.62	3043.33
15.64	3063.33
15.66	3046.67
15.68	3076.67
15.7	3053.33
15.72	3036.67
15.74	3036.67
15.76	3063.33
15.78	3033.33
15.8	3036.67
15.82	3046.67
15.84	3060
15.86	3053.33
15.88	3053.33
15.9	3056.67
15.92	3070
15.94	3043.33
15.96	3063.33
15.98	3063.33
16	3050
16.02	3026.67
16.04	3056.67
16.06	3066.67
16.08	3050
16.1	3056.67
16.12	3026.67
16.14	3023.33
16.16	3046.67
16.18	3046.67
16.2	3030
16.22	3030
16.24	3056.67
16.26	3040
16.28	3060
16.3	3043.33
16.32	3053.33
16.34	3040
16.36	3046.67
16.38	3063.33
16.4	3046.67
16.42	3046.67
16.44	3053.33
16.46	3043.33
16.48	3056.67
16.5	3050
16.52	3060
16.54	3063.33
16.56	3053.33
16.58	3063.33
16.6	3040
16.62	3040
16.64	3076.67
16.66	3033.33
16.68	3053.33
16.7	3040
16.72	3063.33
16.74	3063.33
16.76	3020
16.78	3060
16.8	3056.67
16.82	3040
16.84	3060
16.86	3036.67
16.88	3043.33
16.9	3056.67
16.92	3043.33
16.94	3073.33
16.96	3056.67
16.98	3043.33
17	3053.33
17.02	3056.67
17.04	3070
17.06	3073.33
17.08	3036.67
17.1	3046.67
17.12	3043.33
17.14	3060
17.16	3040
17.18	3050
17.2	3050
17.22	3040
17.24	3053.33
17.26	3043.33
17.28	3046.67
17.3	3066.67
17.32	3043.33
17.34	3046.67
17.36	3060
17.38	3026.67
17.4	3046.67
17.42	3043.33
17.44	3050
17.46	3043.33
17.48	3036.67
17.5	3050
17.52	3026.67
17.54	3060
17.56	3036.67
17.58	3026.67
17.6	3070
17.62	3040
17.64	3056.67
17.66	3060
17.68	3043.33
17.7	3040
17.72	3073.33
17.74	3030
17.76	3033.33
17.78	3040
17.8	3046.67
17.82	3056.67
17.84	3050
17.86	3040
17.88	3020
17.9	3036.67
17.92	3030
17.94	3066.67
17.96	3056.67
17.98	3050
18	3053.33
18.02	3030
18.04	3053.33
18.06	3036.67
18.08	3046.67
18.1	3046.67
18.12	3050
18.14	3056.67
18.16	3056.67
18.18	3046.67
18.2	3060
18.22	3063.33
18.24	3036.67
18.26	3056.67
18.28	3050
18.3	3043.33
18.32	3023.33
18.34	3050
18.36	3056.67
18.38	3063.33
18.4	3056.67
18.42	3043.33
18.44	3046.67
18.46	3030
18.48	3043.33
18.5	3030
18.52	3043.33
18.54	3053.33
18.56	3036.67
18.58	3030
18.6	3036.67
18.62	3066.67
18.64	3033.33
18.66	3046.67
18.68	3036.67
18.7	3020
18.72	3040
18.74	3040
18.76	3046.67
18.78	3043.33
18.8	3043.33
18.82	3046.67
18.84	3030
18.86	3060
18.88	3046.67
18.9	3036.67
18.92	3060
18.94	3050
18.96	3043.33
18.98	3026.67
19	3060
19.02	3060
19.04	3053.33
19.06	3026.67
19.08	3026.67
19.1	3053.33
19.12	3023.33
19.14	3036.67
19.16	3070
19.18	3046.67
19.2	3030
19.22	3030
19.24	3063.33
19.26	3036.67
19.28	3046.67
19.3	3053.33
19.32	3066.67
19.34	3030
19.36	3046.67
19.38	3030
19.4	3033.33
19.42	3043.33
19.44	3046.67
19.46	3063.33
19.48	3026.67
19.5	3026.67
19.52	3030
19.54	3026.67
19.56	3023.33
19.58	3046.67
19.6	3043.33
19.62	3046.67
19.64	3053.33
19.66	3046.67
19.68	3033.33
19.7	3036.67
19.72	3036.67
19.74	3043.33
19.76	3046.67
19.78	3063.33
19.8	3046.67
19.82	3043.33
19.84	3060
19.86	3036.67
19.88	3046.67
19.9	3050
19.92	3043.33
19.94	3046.67
19.96	3046.67
19.98	3060
20	3026.67
20.02	3056.67
20.04	3026.67
20.06	3040
20.08	3050
20.1	3053.33
20.12	3050
20.14	3036.67
20.16	3026.67
20.18	3043.33
20.2	3033.33
20.22	3056.67
20.24	3033.33
20.26	3040
20.28	3040
20.3	3040
20.32	3050
20.34	3043.33
20.36	3053.33
20.38	3050
20.4	3030
20.42	3036.67
20.44	3053.33
20.46	3056.67
20.48	3040
20.5	3056.67
20.52	3043.33
20.54	3036.67
20.56	3033.33
20.58	3053.33
20.6	3056.67
20.62	3040
20.64	3036.67
20.66	3053.33
20.68	3040
20.7	3070
20.72	3046.67
20.74	3026.67
20.76	3050
20.78	3056.67
20.8	3036.67
20.82	3050
20.84	3040
20.86	3050
20.88	3060
20.9	3043.33
20.92	3046.67
20.94	3036.67
20.96	3060
20.98	3043.33
21	3040
21.02	3030
21.04	3050
21.06	3046.67
21.08	3043.33
21.1	3050
21.12	3026.67
21.14	3046.67
21.16	3036.67
21.18	3036.67
21.2	3050
21.22	3030
21.24	3060
21.26	3030
21.28	3033.33
21.3	3040
21.32	3063.33
21.34	3046.67
21.36	3063.33
21.38	3020
21.4	3053.33
21.42	3033.33
21.44	3046.67
21.46	3043.33
21.48	3043.33
21.5	3063.33
21.52	3043.33
21.54	3050
21.56	3023.33
21.58	3046.67
21.6	3030
21.62	3040
21.64	3016.67
21.66	3053.33
21.68	3040
21.7	3056.67
21.72	3050
21.74	3040
21.76	3050
21.78	3030
21.8	3066.67
21.82	3046.67
21.84	3046.67
21.86	3043.33
21.88	3066.67
21.9	3023.33
21.92	3016.67
21.94	3050
21.96	3036.67
21.98	3036.67
22	3066.67
22.02	3056.67
22.04	3070
22.06	3046.67
22.08	3033.33
22.1	3043.33
22.12	3046.67
22.14	3050
22.16	3066.67
22.18	3043.33
22.2	3040
22.22	3056.67
22.24	3063.33
22.26	3066.67
22.28	3046.67
22.3	3043.33
22.32	3053.33
22.34	3050
22.36	3046.67
22.38	3090
22.4	3066.67
22.42	3050
22.44	3036.67
22.46	3060
22.48	3060
22.5	3046.67
22.52	3056.67
22.54	3030
22.56	3076.67
22.58	3080
22.6	3073.33
22.62	3103.33
22.64	3106.67
22.66	3106.67
22.68	3086.67
22.7	3160
22.72	3163.33
22.74	3193.33
22.76	3186.67
22.78	3210
22.8	3323.33
22.82	3333.33
22.84	3316.67
22.86	3293.33
22.88	3150
22.9	3160
22.92	3090
22.94	3053.33
22.96	3073.33
22.98	3053.33
23	3036.67
23.02	3046.67
23.04	3036.67
23.06	3046.67
23.08	3070
23.1	3050
23.12	3050
23.14	3043.33
23.16	3046.67
23.18	3050
23.2	3043.33
23.22	3053.33
23.24	3023.33
23.26	3053.33
23.28	3060
23.3	3063.33
23.32	3050
23.34	3053.33
23.36	3056.67
23.38	3056.67
23.4	3040
23.42	3060
23.44	3056.67
23.46	3043.33
23.48	3056.67
23.5	3056.67
23.52	3090
23.54	3063.33
23.56	3033.33
23.58	3063.33
23.6	3033.33
23.62	3023.33
23.64	3066.67
23.66	3053.33
23.68	3050
23.7	3046.67
23.72	3066.67
23.74	3050
23.76	3040
23.78	3056.67
23.8	3050
23.82	3046.67
23.84	3076.67
23.86	3063.33
23.88	3043.33
23.9	3050
23.92	3053.33
23.94	3040
23.96	3050
23.98	3040
24	3063.33
24.02	3070
24.04	3053.33
24.06	3040
24.08	3053.33
24.1	3056.67
24.12	3033.33
24.14	3036.67
24.16	3066.67
24.18	3066.67
24.2	3043.33
24.22	3060
24.24	3043.33
24.26	3050
24.28	3033.33
24.3	3066.67
24.32	3053.33
24.34	3040
24.36	3043.33
24.38	3046.67
24.4	3053.33
24.42	3043.33
24.44	3046.67
24.46	3060
24.48	3053.33
24.5	3030
24.52	3033.33
24.54	3050
24.56	3080
24.58	3053.33
24.6	3063.33
24.62	3046.67
24.64	3043.33
24.66	3056.67
24.68	3066.67
24.7	3066.67
24.72	3026.67
24.74	3056.67
24.76	3033.33
24.78	3056.67
24.8	3026.67
24.82	3053.33
24.84	3050
24.86	3030
24.88	3063.33
24.9	3043.33
24.92	3040
24.94	3076.67
24.96	3043.33
24.98	3046.67
25	3080
25.02	3040
25.04	3043.33
25.06	3063.33
25.08	3036.67
25.1	3043.33
25.12	3030
25.14	3036.67
25.16	3050
25.18	3030
25.2	3043.33
25.22	3036.67
25.24	3060
25.26	3046.67
25.28	3053.33
25.3	3036.67
25.32	3030
25.34	3043.33
25.36	3050
25.38	3046.67
25.4	3036.67
25.42	3060
25.44	3026.67
25.46	3043.33
25.48	3050
25.5	3043.33
25.52	3063.33
25.54	3033.33
25.56	3046.67
25.58	3046.67
25.6	3040
25.62	3043.33
25.64	3076.67
25.66	3066.67
25.68	3053.33
25.7	3060
25.72	3046.67
25.74	3030
25.76	3056.67
25.78	3060
25.8	3033.33
25.82	3066.67
25.84	3043.33
25.86	3050
25.88	3033.33
25.9	3033.33
25.92	3063.33
25.94	3073.33
25.96	3066.67
25.98	3030
26	3050
26.02	3036.67
26.04	3050
26.06	3050
26.08	3046.67
26.1	3053.33
26.12	3050
26.14	3040
26.16	3030
26.18	3060
26.2	3026.67
26.22	3030
26.24	3046.67
26.26	3070
26.28	3036.67
26.3	3073.33
26.32	3033.33
26.34	3046.67
26.36	3036.67
26.38	3070
26.4	3056.67
26.42	3076.67
26.44	3040
26.46	3046.67
26.48	3040
26.5	3056.67
26.52	3033.33
26.54	3026.67
26.56	3053.33
26.58	3056.67
26.6	3040
26.62	3036.67
26.64	3060
26.66	3076.67
26.68	3050
26.7	3053.33
26.72	3036.67
26.74	3036.67
26.76	3050
26.78	3053.33
26.8	3050
26.82	3030
26.84	3033.33
26.86	3056.67
26.88	3060
26.9	3056.67
26.92	3050
26.94	3030
26.96	3066.67
26.98	3046.67
27	3040
27.02	3076.67
27.04	3056.67
27.06	3040
27.08	3050
27.1	3050
27.12	3056.67
27.14	3090
27.16	3026.67
27.18	3020
27.2	3076.67
27.22	3040
27.24	3063.33
27.26	3053.33
27.28	3056.67
27.3	3060
27.32	3053.33
27.34	3036.67
27.36	3023.33
27.38	3060
27.4	3036.67
27.42	3053.33
27.44	3050
27.46	3033.33
27.48	3046.67
27.5	3046.67
27.52	3030
27.54	3056.67
27.56	3066.67
27.58	3053.33
27.6	3036.67
27.62	3050
27.64	3040
27.66	3053.33
27.68	3043.33
27.7	3046.67
27.72	3070
27.74	3026.67
27.76	3060
27.78	3056.67
27.8	3030
27.82	3053.33
27.84	3080
27.86	3083.33
27.88	3056.67
27.9	3056.67
27.92	3056.67
27.94	3053.33
27.96	3040
27.98	3050
28	3050
28.02	3023.33
28.04	3053.33
28.06	3053.33
28.08	3056.67
28.1	3053.33
28.12	3056.67
28.14	3056.67
28.16	3056.67
28.18	3050
28.2	3046.67
28.22	3036.67
28.24	3070
28.26	3063.33
28.28	3043.33
28.3	3030
28.32	3050
28.34	3043.33
28.36	3080
28.38	3063.33
28.4	3066.67
28.42	3056.67
28.44	3080
28.46	3053.33
28.48	3043.33
28.5	3063.33
28.52	3073.33
28.54	3043.33
28.56	3036.67
28.58	3056.67
28.6	3040
28.62	3050
28.64	3076.67
28.66	3053.33
28.68	3073.33
28.7	3056.67
28.72	3050
28.74	3066.67
28.76	3063.33
28.78	3033.33
28.8	3060
28.82	3040
28.84	3073.33
28.86	3053.33
28.88	3066.67
28.9	3070
28.92	3060
28.94	3046.67
28.96	3070
28.98	3050
29	3040
29.02	3070
29.04	3080
29.06	3053.33
29.08	3053.33
29.1	3043.33
29.12	3050
29.14	3060
29.16	3043.33
29.18	3043.33
29.2	3060
29.22	3056.67
29.24	3043.33
29.26	3080
29.28	3076.67
29.3	3060
29.32	3046.67
29.34	3050
29.36	3030
29.38	3070
29.4	3036.67
29.42	3040
29.44	3066.67
29.46	3050
29.48	3053.33
29.5	3060
29.52	3060
29.54	3036.67
29.56	3040
29.58	3050
29.6	3063.33
29.62	3033.33
29.64	3076.67
29.66	3046.67
29.68	3070
29.7	3060
29.72	3076.67
29.74	3043.33
29.76	3046.67
29.78	3030
29.8	3070
29.82	3053.33
29.84	3090
29.86	3053.33
29.88	3080
29.9	3086.67
29.92	3050
29.94	3053.33
29.96	3060
29.98	3053.33
30	3070
30.02	3023.33
30.04	3050
30.06	3053.33
30.08	3046.67
30.1	3036.67
30.12	3050
30.14	3043.33
30.16	3060
30.18	3070
30.2	3030
30.22	3043.33
30.24	3043.33
30.26	3046.67
30.28	3036.67
30.3	3046.67
30.32	3076.67
30.34	3040
30.36	3060
30.38	3060
30.4	3053.33
30.42	3053.33
30.44	3030
30.46	3070
30.48	3033.33
30.5	3073.33
30.52	3050
30.54	3060
30.56	3043.33
30.58	3046.67
30.6	3033.33
30.62	3056.67
30.64	3053.33
30.66	3066.67
30.68	3056.67
30.7	3043.33
30.72	3066.67
30.74	3040
30.76	3066.67
30.78	3046.67
30.8	3036.67
30.82	3046.67
30.84	3070
30.86	3033.33
30.88	3073.33
30.9	3053.33
30.92	3060
30.94	3050
30.96	3040
30.98	3070
31	3053.33
31.02	3036.67
31.04	3043.33
31.06	3063.33
31.08	3060
31.1	3036.67
31.12	3060
31.14	3056.67
31.16	3046.67
31.18	3050
31.2	3060
31.22	3046.67
31.24	3060
31.26	3060
31.28	3076.67
31.3	3043.33
31.32	3056.67
31.34	3056.67
31.36	3056.67
31.38	3063.33
31.4	3050
31.42	3070
31.44	3046.67
31.46	3056.67
31.48	3053.33
31.5	3063.33
31.52	3073.33
31.54	3060
31.56	3076.67
31.58	3060
31.6	3053.33
31.62	3053.33
31.64	3066.67
31.66	3056.67
31.68	3046.67
31.7	3060
31.72	3073.33
31.74	3033.33
31.76	3066.67
31.78	3050
31.8	3083.33
31.82	3050
31.84	3073.33
31.86	3093.33
31.88	3060
31.9	3080
31.92	3103.33
31.94	3063.33
31.96	3073.33
31.98	3080
32	3080
32.02	3076.67
32.04	3053.33
32.06	3073.33
32.08	3066.67
32.1	3090
32.12	3090
32.14	3080
32.16	3090
32.18	3096.67
32.2	3150
32.22	3130
32.24	3183.33
32.26	3210
32.28	3330
32.3	3400
32.32	3493.33
32.34	3610
32.36	3786.67
32.38	4096.67
32.4	4546.67
32.42	5186.67
32.44	5856.67
32.46	6750
32.48	7063.33
32.5	6806.67
32.52	5920
32.54	5390
32.56	5030
32.58	4813.33
32.6	4250
32.62	3546.67
32.64	3356.67
32.66	3186.67
32.68	3180
32.7	3143.33
32.72	3123.33
32.74	3106.67
32.76	3116.67
32.78	3090
32.8	3096.67
32.82	3090
32.84	3120
32.86	3076.67
32.88	3063.33
32.9	3076.67
32.92	3063.33
32.94	3060
32.96	3086.67
32.98	3090
33	3066.67
33.02	3060
33.04	3046.67
33.06	3066.67
33.08	3090
33.1	3056.67
33.12	3060
33.14	3086.67
33.16	3066.67
33.18	3056.67
33.2	3090
33.22	3056.67
33.24	3063.33
33.26	3066.67
33.28	3050
33.3	3046.67
33.32	3060
33.34	3050
33.36	3060
33.38	3046.67
33.4	3050
33.42	3076.67
33.44	3050
33.46	3070
33.48	3053.33
33.5	3066.67
33.52	3033.33
33.54	3053.33
33.56	3023.33
33.58	3083.33
33.6	3060
33.62	3043.33
33.64	3050
33.66	3046.67
33.68	3063.33
33.7	3046.67
33.72	3060
33.74	3043.33
33.76	3056.67
33.78	3036.67
33.8	3030
33.82	3050
33.84	3053.33
33.86	3040
33.88	3040
33.9	3046.67
33.92	3036.67
33.94	3043.33
33.96	3053.33
33.98	3033.33
34	3046.67
34.02	3026.67
34.04	3063.33
34.06	3026.67
34.08	3056.67
34.1	3040
34.12	3053.33
34.14	3043.33
34.16	3066.67
34.18	3053.33
34.2	3036.67
34.22	3053.33
34.24	3050
34.26	3040
34.28	3066.67
34.3	3036.67
34.32	3033.33
34.34	3050
34.36	3086.67
34.38	3063.33
34.4	3050
34.42	3066.67
34.44	3036.67
34.46	3040
34.48	3030
34.5	3033.33
34.52	3026.67
34.54	3046.67
34.56	3043.33
34.58	3060
34.6	3036.67
34.62	3013.33
34.64	3030
34.66	3020
34.68	3040
34.7	3053.33
34.72	3050
34.74	3046.67
34.76	3036.67
34.78	3040
34.8	3046.67
34.82	3043.33
34.84	3036.67
34.86	3016.67
34.88	3053.33
34.9	3040
34.92	3040
34.94	3043.33
34.96	3040
34.98	3043.33
35	3033.33
35.02	3040
35.04	3030
35.06	3023.33
35.08	3033.33
35.1	3070
35.12	3033.33
35.14	3046.67
35.16	3030
35.18	3033.33
35.2	3060
35.22	3033.33
35.24	3030
35.26	3063.33
35.28	3033.33
35.3	3043.33
35.32	3036.67
35.34	3030
35.36	3043.33
35.38	3040
35.4	3033.33
35.42	3036.67
35.44	3026.67
35.46	3043.33
35.48	3040
35.5	3046.67
35.52	3033.33
35.54	3043.33
35.56	3060
35.58	3066.67
35.6	3053.33
35.62	3023.33
35.64	3026.67
35.66	3033.33
35.68	3040
35.7	3043.33
35.72	3050
35.74	3040
35.76	3033.33
35.78	3046.67
35.8	3026.67
35.82	3036.67
35.84	3060
35.86	3050
35.88	3023.33
35.9	3023.33
35.92	3046.67
35.94	3086.67
35.96	3020
35.98	3033.33
36	3033.33
36.02	3030
36.04	3046.67
36.06	3030
36.08	3036.67
36.1	3026.67
36.12	3036.67
36.14	3030
36.16	3020
36.18	3033.33
36.2	3056.67
36.22	3036.67
36.24	3020
36.26	3040
36.28	3036.67
36.3	3046.67
36.32	3063.33
36.34	3050
36.36	3026.67
36.38	3030
36.4	3046.67
36.42	3036.67
36.44	3040
36.46	3046.67
36.48	3050
36.5	3020
36.52	3050
36.54	3036.67
36.56	3030
36.58	3026.67
36.6	3036.67
36.62	3040
36.64	3040
36.66	3053.33
36.68	3033.33
36.7	3036.67
36.72	3030
36.74	3036.67
36.76	3040
36.78	3036.67
36.8	3053.33
36.82	3040
36.84	3023.33
36.86	3036.67
36.88	3043.33
36.9	3036.67
36.92	3046.67
36.94	3023.33
36.96	3013.33
36.98	3026.67
37	3046.67
37.02	3026.67
37.04	3046.67
37.06	3036.67
37.08	3016.67
37.1	3030
37.12	3043.33
37.14	3076.67
37.16	3050
37.18	3050
37.2	3046.67
37.22	3020
37.24	3036.67
37.26	3026.67
37.28	3033.33
37.3	3040
37.32	3023.33
37.34	3056.67
37.36	3036.67
37.38	3050
37.4	3033.33
37.42	3033.33
37.44	3023.33
37.46	3036.67
37.48	3026.67
37.5	3043.33
37.52	3043.33
37.54	3043.33
37.56	3033.33
37.58	3043.33
37.6	3036.67
37.62	3036.67
37.64	3036.67
37.66	3046.67
37.68	3023.33
37.7	3023.33
37.72	3030
37.74	3040
37.76	3040
37.78	3053.33
37.8	3036.67
37.82	3023.33
37.84	3033.33
37.86	3016.67
37.88	3033.33
37.9	3023.33
37.92	3043.33
37.94	3060
37.96	3033.33
37.98	3033.33
38	3046.67
38.02	3033.33
38.04	3033.33
38.06	3043.33
38.08	3030
38.1	3030
38.12	3040
38.14	3026.67
38.16	3053.33
38.18	3053.33
38.2	3033.33
38.22	3060
38.24	3050
38.26	3030
38.28	3040
38.3	3043.33
38.32	3076.67
38.34	3043.33
38.36	3046.67
38.38	3053.33
38.4	3033.33
38.42	3046.67
38.44	3040
38.46	3050
38.48	3030
38.5	3013.33
38.52	3033.33
38.54	3023.33
38.56	3043.33
38.58	3040
38.6	3026.67
38.62	3023.33
38.64	3030
38.66	3040
38.68	3040
38.7	3026.67
38.72	3040
38.74	3033.33
38.76	3026.67
38.78	3026.67
38.8	3043.33
38.82	3040
38.84	3046.67
38.86	3040
38.88	3046.67
38.9	3026.67
38.92	3036.67
38.94	3050
38.96	3026.67
38.98	3043.33
39	3053.33
39.02	3046.67
39.04	3030
39.06	3036.67
39.08	3013.33
39.1	3043.33
39.12	3026.67
39.14	3036.67
39.16	3036.67
39.18	3026.67
39.2	3030
39.22	3046.67
39.24	3033.33
39.26	3026.67
39.28	3036.67
39.3	3036.67
39.32	3043.33
39.34	3046.67
39.36	3043.33
39.38	3050
39.4	3026.67
39.42	3043.33
39.44	3043.33
39.46	3060
39.48	3033.33
39.5	3046.67
39.52	3050
39.54	3046.67
39.56	3030
39.58	3023.33
39.6	3036.67
39.62	3026.67
39.64	3036.67
39.66	3033.33
39.68	3020
39.7	3033.33
39.72	3046.67
39.74	3050
39.76	3033.33
39.78	3043.33
39.8	3046.67
39.82	3053.33
39.84	3050
39.86	3100
39.88	3103.33
39.9	3076.67
39.92	3126.67
39.94	3166.67
39.96	3253.33
39.98	3356.67
40	3470
40.02	3566.67
40.04	3750
40.06	3770
40.08	3636.67
40.1	3480
40.12	3383.33
40.14	3460
40.16	3396.67
40.18	3346.67
40.2	3196.67
40.22	3096.67
40.24	3103.33
40.26	3066.67
40.28	3073.33
40.3	3040
40.32	3033.33
40.34	3026.67
40.36	3043.33
40.38	3036.67
40.4	3033.33
40.42	3030
40.44	3026.67
40.46	3030
40.48	3056.67
40.5	3026.67
40.52	3033.33
40.54	3046.67
40.56	3056.67
40.58	3040
40.6	3046.67
40.62	3026.67
40.64	3030
40.66	3050
40.68	3053.33
40.7	3053.33
40.72	3033.33
40.74	3030
40.76	3046.67
40.78	3023.33
40.8	3030
40.82	3016.67
40.84	3036.67
40.86	3023.33
40.88	3030
40.9	3026.67
40.92	3063.33
40.94	3060
40.96	3046.67
40.98	3046.67
41	3016.67
41.02	3040
41.04	3030
41.06	3033.33
41.08	3033.33
41.1	3030
41.12	3030
41.14	3033.33
41.16	3026.67
41.18	3036.67
41.2	3036.67
41.22	3056.67
41.24	3033.33
41.26	3023.33
41.28	3026.67
41.3	3030
41.32	3046.67
41.34	3033.33
41.36	3020
41.38	3030
41.4	3040
41.42	3023.33
41.44	3033.33
41.46	3053.33
41.48	3033.33
41.5	3013.33
41.52	3043.33
41.54	3030
41.56	3030
41.58	3036.67
41.6	3063.33
41.62	3033.33
41.64	3046.67
41.66	3013.33
41.68	3036.67
41.7	3046.67
41.72	3036.67
41.74	3033.33
41.76	3026.67
41.78	3036.67
41.8	3036.67
41.82	3036.67
41.84	3026.67
41.86	3033.33
41.88	3030
41.9	3040
41.92	3020
41.94	3033.33
41.96	3046.67
41.98	3030
42	3023.33
42.02	3026.67
42.04	3030
42.06	3010
42.08	3043.33
42.1	3060
42.12	3040
42.14	3043.33
42.16	3030
42.18	3020
42.2	3026.67
42.22	3070
42.24	3033.33
42.26	3016.67
42.28	3023.33
42.3	3046.67
42.32	3036.67
42.34	3030
42.36	3040
42.38	3033.33
42.4	3026.67
42.42	3023.33
42.44	3036.67
42.46	3046.67
42.48	3033.33
42.5	3036.67
42.52	3036.67
42.54	3036.67
42.56	3020
42.58	3033.33
42.6	3046.67
42.62	3026.67
42.64	3023.33
42.66	3036.67
42.68	3033.33
42.7	3026.67
42.72	3016.67
42.74	3043.33
42.76	3020
42.78	3030
42.8	3026.67
42.82	3033.33
42.84	3016.67
42.86	3040
42.88	3033.33
42.9	3026.67
42.92	3036.67
42.94	3053.33
42.96	3020
[truncated: 1,852 more rows]
